# Supplementary material
Source: PubMed Central journal article supplement (PMC6237061)
Supplement: CJN.04020318SupplementaryData.pdf [file CJN.04020318SupplementaryData.pdf]

Supplemental material is neither peer-reviewed nor thoroughly edited by CJASN. The authors alone are responsible for the accuracy and presentation of the material.

### **Supplemental Material**

**Supplemental Table 1.** Demographic, clinical, and laboratory characteristics and treatment of the entire study cohort.

**Supplemental Table 2.** Demographic, clinical, and laboratory characteristics and treatment in urea-only treated patients.

**Supplemental Table 3.** Demographic, clinical, and laboratory characteristics and treatment in urea-untreated patients

**Supplemental Table 4.** Daily change in plasma sodium in patients on varying doses of urea.

Supplemental material is neither peer-reviewed nor thoroughly edited by CJASN. The authors alone are responsible for the accuracy and presentation of the material.

**Supplemental Table 1. Demographic, clinical, and laboratory characteristics and treatment of the entire study cohort.**

| Patient No | Age (yr.) | Sex | Admission weight (kg) | Clinical Characteristics of Hyponatremia |                  | Baseline Laboratory Values |             |            |                |                      | Treatment of Hyponatremia |                      |                      | End of Therapy Laboratory Values |             |            |
|------------|-----------|-----|-----------------------|------------------------------------------|------------------|----------------------------|-------------|------------|----------------|----------------------|---------------------------|----------------------|----------------------|----------------------------------|-------------|------------|
|            |           |     |                       | Etiology                                 | Symptoms         | Plasma sodium (mEq/L)      | BUN (mg/dL) | Cr (mg/dL) | UOsm (mOsm/kg) | Urine sodium (mEq/L) | Urea dose (grams/day)     | Urea duration (days) | Other therapies used | Plasma sodium (mEq/L)            | BUN (mg/dL) | Cr (mg/dL) |
| 1          | 51        | M   | 97                    | SIADH                                    | Unknown          | 125                        | 4           | 0.5        | 618            | 277                  | 30                        | 9                    | FR, ST, LD, HS       | 136                              | 19          | 0.6        |
| 2          | 63        | M   | 50                    | SIADH                                    | Absent           | 122                        | 21          | 0.4        | 901            | 162                  | 30                        | 16                   | FR, ST, LD           | 130                              | 20          | 0.4        |
| 3          | 32        | M   | 89                    | AI                                       | Mild to moderate | 114                        | 7           | 0.5        | 533            | 175                  | 30                        | 2                    | FR, GLU              | 126                              | 24          | 1          |
| 4          | 55        | M   | 93.6                  | HF                                       | Mild to moderate | 117                        | 24          | 0.9        | 809            | 140                  | 30-90                     | 10                   | FR, LD, HS           | 133                              | 56          | 0.7        |
| 5          | 27        | F   | 59                    | HF                                       | Absent           | 129                        | 12          | 0.5        | 298            | 58                   | 15-60                     | 6                    | FR, LD, HS, KCL      | 131                              | 18          | 0.5        |
| 6          | 68        | M   | 76.95                 | HF                                       | Absent           | 126                        | 18          | 0.5        | 584            | 38                   | 15                        | 7                    | FR                   | 131                              | 20          | 0.7        |
| 7          | 74        | F   | 64                    | SIADH                                    | Absent           | 127                        | 11          | 0.6        | 605            | 80                   | 15                        | 1                    | FR, ST               | 133                              | 34          | 0.8        |
| 8          | 61        | F   | NA                    | SIADH                                    | Unknown          | 125                        | 25          | 0.8        | 305            | 77                   | 30                        | 5                    | FR                   | 137                              | 69          | 0.6        |
| 9          | 72        | F   | 122                   | SIADH                                    | Absent           | 119                        | 8           | 0.8        | 351            | 42                   | 15-30                     | 7                    | FR                   | 131                              | 26          | 0.9        |
| 10         | 50        | M   | 122                   | CIR                                      | Absent           | 125                        | 14          | 0.8        | 289            | 99                   | 30                        | 6                    | FR, ST, LD           | 120                              | 59          | 1.1        |
| 11         | 59        | M   | 89                    | SIADH                                    | Absent           | 127                        | 10          | 0.8        | 319            | 27                   | 30                        | 6                    | FR                   | 135                              | 26          | 0.7        |
| 12         | 82        | M   | 76.2                  | SIADH                                    | Absent           | 122                        | 18          | 0.7        | 727            | 77                   | 15-60                     | 6                    | LD, NS               | 133                              | 46          | 0.8        |
| 13         | 84        | M   | 66                    | SIADH                                    | Absent           | 126                        | 10          | 0.7        | 400            | 140                  | 15                        | 2                    | FR, ST               | 126                              | 17          | 0.7        |
| 14         | 76        | M   | 61                    | SIADH                                    | Absent           | 125                        | 10          | 0.6        | 561            | 94                   | 30                        | 3                    | FR                   | 129                              | 44          | 1          |
| 15         | 72        | M   | 107.2                 | SIADH                                    | Absent           | 128                        | 13          | 0.7        | 467            | 66                   | 15-30                     | 4                    | FR                   | 133                              | 45          | 1          |
| 16         | 37        | M   | 131.5                 | SIADH                                    | Absent           | 129                        | 15          | 0.7        | 590            | 97                   | 30                        | 3                    | FR, LD               | 131                              | 24          | 0.8        |
| 17         | 78        | F   | 60                    | SIADH, TZ                                | Absent           | 121                        | 16          | 0.7        | 550            | 29                   | 30                        | 3                    | FR                   | 136                              | 48          | 0.8        |
| 18         | 55        | M   | 65                    | SIADH                                    | Absent           | 123                        | 5           | 0.4        | 382            | 167                  | 30-60                     | 11                   | FR, NS, KCL          | 136                              | 52          | 0.6        |
| 19         | 31        | F   | 64                    | SIADH                                    | Absent           | 122                        | 5           | 0.6        | 723            | 156                  | 15                        | 1                    | FR, ST               | 133                              | 13          | 0.6        |
| 20         | 57        | M   | 58                    | AI                                       | Absent           | 124                        | 6           | 0.8        | 432            | 165                  | 30                        | 10                   | FR, ST               | 127                              | 40          | 0.9        |
| 21         | 85        | M   | 71                    | SIADH                                    | Absent           | 119                        | 17          | 0.8        | 431            | 75                   | 60                        | 8                    | FR                   | 136                              | 60          | 0.9        |
| 22         | 55        | F   | 64                    | HYP, KD                                  | Absent           | 122                        | 52          | 1.3        | 577            | 10                   | 15                        | 2                    | FR, NS               | 125                              | 65          | 1.7        |
| 23         | 71        | F   | 127                   | HF                                       | Absent           | 122                        | 24          | 0.8        | 263            | 92                   | 60                        | 3                    | LD                   | 127                              | 89          | 1.1        |
| 24         | 75        | F   | 69.5                  | KD                                       | Absent           | 122                        | 50          | 4.2        | 249            | 29                   | 15                        | 4                    | FR, LD               | 129                              | 83          | 3.9        |
| 25         | 67        | M   | 72.9                  | SIADH                                    | Mild             | 126                        | 12          | 0.6        | 299            | 45                   | 60                        | 14                   | FR, ST               | 132                              | 45          | 0.7        |
| 26         | 81        | F   | NA                    | SIADH                                    | Absent           | 124                        | 9           | 0.5        | 404            | 130.4                | 60                        | 4                    | FR, KCL              | 131                              | 36          | 0.5        |
| 27         | 66        | M   | 93                    | HF                                       | Absent           | 126                        | 23          | 0.9        | 396            | 15                   | 30                        | 2                    | FR, LD               | 127                              | 29          | 0.8        |
| 28         | 57        | M   | 80.4                  | SIADH                                    | Absent           | 121                        | 5           | 0.6        | 365            | 146                  | 15                        | 2                    | NA                   | 121                              | 20          | 0.6        |
| 29         | >89       | M   | NA                    | SIADH                                    | Mild             | 122                        | 13          | 0.7        | 462            | 69                   | 30                        | 4                    | FR, LD               | 124                              | 28          | 0.8        |

Supplemental material is neither peer-reviewed nor thoroughly edited by CJASN. The authors alone are responsible for the accuracy and presentation of the material.

|    |     |   |       |                             |                     |     |    |     |      |     |       |    |                    |     |    |     |
|----|-----|---|-------|-----------------------------|---------------------|-----|----|-----|------|-----|-------|----|--------------------|-----|----|-----|
| 30 | 70  | M | 77.7  | SIADH                       | Absent              | 126 | 15 | 1.1 | NA   | NA  | 30    | 6  | FR                 | 129 | 39 | 1.2 |
| 31 | 52  | M | 124.2 | SIADH                       | Absent              | 125 | 13 | 0.6 | 450  | 47  | 45    | 7  | FR, LD             | 135 | 28 | 0.5 |
| 32 | 46  | F | 71.9  | SIADH                       | Absent              | 126 | 7  | 0.6 | 361  | 105 | 15    | 6  | VRA                | 126 | 15 | 0.5 |
| 33 | 28  | F | 116.2 | SIADH,<br>TZ                | Unknown             | 131 | 13 | 0.5 | 1087 | 85  | 15    | 1  | ST                 | 137 | 12 | 0.5 |
| 34 | 66  | M | 68    | SIADH,<br>HYP,<br>KD        | Absent              | 121 | 59 | 1.6 | 614  | 25  | 15    | 2  | ST, HS             | 120 | 78 | 1.3 |
| 35 | 68  | M | NA    | SIADH                       | Absent              | 122 | 39 | 0.6 | 373  | 77  | 30    | 16 | FR, ST, VRA        | 136 | 64 | 0.7 |
| 36 | 58  | M | NA    | SIADH                       | Absent              | 127 | 24 | 0.8 | 635  | 117 | 30    | 9  | FR, LD, NS         | 131 | 54 | 0.9 |
| 37 | 79  | M | NA    | SIADH                       | Absent              | 126 | 17 | 0.9 | 573  | 130 | 30    | 3  | FR                 | 128 | 26 | 0.8 |
| 38 | 75  | M | NA    | SIADH                       | Absent              | 127 | 16 | 0.7 | 361  | 40  | 30    | 3  | FR, ST, NS,<br>VRA | 129 | 20 | 0.6 |
| 39 | 77  | F | 73.3  | SIADH,<br>TZ                | Mild                | 117 | 11 | 0.5 | 343  | 59  | 30    | 3  | FR, ST             | 131 | 25 | 0.6 |
| 40 | 53  | M | NA    | SIADH,<br>TZ                | Absent              | 121 | 19 | 0.8 | 758  | 30  | 30    | 4  | FR, ST             | 126 | 25 | 0.9 |
| 41 | 31  | F | 53.6  | SIADH                       | Absent              | 129 | 10 | 0.3 | 350  | 124 | 15-30 | 14 | ST, NS             | 136 | 19 | 0.3 |
| 42 | 55  | M | 100   | SIADH                       | Absent              | 124 | 10 | 0.7 | 363  | 97  | 30    | 7  | FR, VRA            | 133 | 20 | 0.8 |
| 43 | 63  | M | 90    | SIADH                       | Absent              | 128 | 13 | 0.4 | 675  | 221 | 30    | 6  | FR, ST             | 140 | 39 | 0.3 |
| 44 | 86  | F | 62    | SIADH                       | Mild                | 124 | 17 | 0.5 | 348  | 56  | 45    | 6  | FR, LD, VRA        | 134 | 70 | 0.5 |
| 45 | 65  | M | 113   | SIADH,<br>TZ,<br>HYP        | Absent              | 124 | 23 | 1   | 633  | 40  | 30    | 5  | FR, ST, VRA        | 126 | 45 | 1   |
| 46 | 64  | M | 64    | SIADH                       | Absent              | 127 | 8  | 0.7 | 309  | 124 | 30    | 2  | FR, ST             | 127 | 8  | 0.7 |
| 47 | 79  | M | 122.9 | SIADH                       | Absent              | 113 | 12 | 0.8 | 477  | 68  | 30    | 9  | FR, LD, NS         | 130 | 28 | 0.9 |
| 48 | 80  | F | 79    | SIADH,<br>HYP               | Mild to<br>moderate | 109 | 8  | 0.4 | 464  | 15  | 60    | 9  | FR, ST             | 130 | 35 | 0.4 |
| 49 | 71  | F | NA    | SIADH                       | Absent              | 122 | 19 | 1.2 | 220  | 17  | 30    | 2  | FR                 | 128 | 45 | 1.2 |
| 50 | 66  | M | 95    | SIADH                       | Moderate            | 125 | 20 | 0.9 | 562  | 105 | 30    | 4  | FR                 | 131 | 35 | 0.9 |
| 51 | 81  | F | 48    | SIADH                       | Unknown             | 124 | 14 | 0.3 | 592  | 173 | 30    | 9  | FR, ST, NS         | 136 | 18 | 0.3 |
| 52 | 64  | F | 40.2  | SIADH                       | Absent              | 124 | 15 | 0.4 | 325  | 27  | 15-45 | 2  | FR, ST, NS         | 128 | 34 | 0.4 |
| 53 | >89 | F | 59    | SIADH                       | Absent              | 124 | 14 | 0.8 | 450  | 89  | 30    | 2  | FR, NS             | 135 | 61 | 1   |
| 54 | 88  | F | 80    | SIADH,<br>TZ,<br>HYP,<br>KD | Absent              | 126 | 29 | 0.9 | 378  | 13  | 15    | 3  | FR, LD             | 130 | 40 | 1.1 |
| 55 | 86  | F | 63.5  | SIADH,<br>TZ                | Absent              | 129 | 29 | 1.1 | 316  | 54  | 30    | 4  | FR                 | 137 | 73 | 1   |
| 56 | 70  | F | NA    | SIADH,<br>HYP               | Absent              | 128 | 36 | 0.8 | 424  | 11  | 15-30 | 7  | FR, LD, NS         | 132 | 27 | 0.7 |
| 57 | >89 | M | 51.8  | SIADH                       | Absent              | 118 | 15 | 1   | 636  | 80  | 30    | 9  | FR, ST, LD,<br>NS  | 126 | 31 | 0.8 |
| 58 | 86  | M | 79    | HF                          | Absent              | 118 | 62 | 2.2 | 339  | 18  | 7.5   | 1  | FR, LD             | 121 | 67 | 1.9 |

Supplemental material is neither peer-reviewed nor thoroughly edited by CJASN. The authors alone are responsible for the accuracy and presentation of the material.

BUN = blood urea nitrogen, Cr = plasma creatinine, UOsm=urine osmolality, SIADH=Syndrome of inappropriate ADH secretion, TZ=thiazide diuretics, HF=heart failure, HYP=hypovolemia, KD=kidney disease, AI=adrenal insufficiency, CIR=cirrhosis, FR=fluid restriction, ST=salt tablets, LD=loop diuretics, NS=normal saline. VRA=vasopressin antagonists, HS=hypertonic saline, KCL=potassium chloride, GLU=glucocorticoids, NA = not available. Mild symptoms of hyponatremia include fatigue, nausea, and headaches. Moderate symptoms of hyponatremia include confusion, disorientation, and lethargy. Mild to moderate symptoms of hyponatremia is a mixed of mild and moderate symptoms.

Supplemental material is neither peer-reviewed nor thoroughly edited by CJASN. The authors alone are responsible for the accuracy and presentation of the material.

**Supplemental Table 2. Demographic, clinical, and laboratory characteristics and treatment in urea-only treated patients.**

| Patient № | Age (years) | Sex | Etiology of hyponatremia | Baseline laboratory values |                |                      | Treatment of hyponatremia |                      | Outcomes                            |                                                 |            |
|-----------|-------------|-----|--------------------------|----------------------------|----------------|----------------------|---------------------------|----------------------|-------------------------------------|-------------------------------------------------|------------|
|           |             |     |                          | Plasma sodium (mEq/L)      | UOsm (mOsm/kg) | Urine sodium (mEq/L) | Urea dose (grams/day)     | Urea duration (days) | Plasma sodium change at 24h (mEq/L) | Plasma sodium change at the end of urea (mEq/L) | LOS (days) |
| 8         | 61          | F   | SIADH                    | 125                        | 305            | 77                   | 30                        | 5                    | 4                                   | 12                                              | 11         |
| 9         | 72          | F   | SIADH                    | 119                        | 351            | 42                   | 15-30                     | 7                    | 4                                   | 12                                              | 7          |
| 11        | 59          | M   | SIADH                    | 127                        | 319            | 27                   | 30                        | 6                    | 1                                   | 8                                               | 6          |
| 14        | 76          | M   | SIADH                    | 125                        | 561            | 94                   | 30                        | 3                    | 0                                   | 4                                               | 3          |
| 15        | 72          | M   | SIADH                    | 128                        | 467            | 66                   | 15-30                     | 4                    | -1                                  | 5                                               | 4          |
| 21        | 85          | M   | SIADH                    | 119                        | 431            | 75                   | 60                        | 8                    | 3                                   | 17                                              | 8          |
| 28        | 57          | M   | SIADH                    | 121                        | 365            | 146                  | 15                        | 2                    | 0                                   | 0                                               | 7          |
| 30        | 70          | M   | SIADH                    | 126                        | NA             | NA                   | 30                        | 6                    | 5                                   | 3                                               | 6          |
| 37        | 79          | M   | SIADH                    | 126                        | 573            | 130                  | 30                        | 3                    | -1                                  | 2                                               | 3          |
| 49        | 71          | F   | SIADH                    | 122                        | 220            | 17                   | 30                        | 2                    | 6                                   | 6                                               | 2          |
| 50        | 66          | M   | SIADH                    | 125                        | 562            | 105                  | 30                        | 4                    | 2                                   | 6                                               | 4          |
| 55        | 86          | F   | SIADH                    | 129                        | 316            | 54                   | 30                        | 4                    | 5                                   | 8                                               | 7          |

UOsm=urine osmolality, LOS=length of hospital stay after initiation of urea, SIADH=Syndrome of inappropriate ADH secretion, TZ=thiazide diuretics, NA = not available

Supplemental material is neither peer-reviewed nor thoroughly edited by CJASN. The authors alone are responsible for the accuracy and presentation of the material.

**Supplemental Table 3. Demographic, clinical, and laboratory characteristics and treatment in urea-untreated patients.**

| Patient № | Age (years) | Sex | Etiology of hyponatremia | Baseline laboratory values |                |                      | Therapy of hyponatremia |                            | Outcomes                            |                                                    |            |
|-----------|-------------|-----|--------------------------|----------------------------|----------------|----------------------|-------------------------|----------------------------|-------------------------------------|----------------------------------------------------|------------|
|           |             |     |                          | Plasma sodium (mEq/L)      | UOsm (mOsm/kg) | Urine sodium (mEq/L) | Therapies used          | Duration of therapy (days) | Plasma sodium change at 24h (mEq/L) | Plasma sodium change at the end of therapy (mEq/L) | LOS (days) |
| 1         | 80          | F   | SIADH                    | 124                        | 409            | 86                   | FR, HS, KCL             | 4                          | -1                                  | 11                                                 | 4          |
| 2         | 66          | F   | SIADH                    | 121                        | 415            | 65                   | FR, ST, LD, KCL         | 9                          | 3                                   | 3                                                  | 9          |
| 3         | 60          | M   | SIADH                    | 128                        | 504            | 29                   | FR, NS                  | 6                          | -3                                  | -2                                                 | 6          |
| 4         | 89          | M   | SIADH                    | 123                        | 629            | NA                   | FR, ST, NS              | 6                          | -2                                  | 7                                                  | 6          |
| 5         | 40          | M   | SIADH                    | 126                        | 514            | 105                  | FR, ST, HS              | 6                          | -2                                  | 7                                                  | 6          |
| 6         | 87          | M   | SIADH                    | 119                        | 463            | 138                  | FR, ST                  | 4                          | 2                                   | 7                                                  | 4          |
| 7         | 62          | M   | SIADH                    | 121                        | 299            | 53                   | FR, NS                  | 7                          | 7                                   | 11                                                 | 7          |
| 8         | 88          | M   | SIADH                    | 124                        | 730            | 38                   | FR, LD, NS, KCL         | 6                          | 1                                   | 3                                                  | 6          |
| 9         | 87          | M   | SIADH                    | 123                        | 396            | 109                  | FR, ST, VRA             | 4                          | -3                                  | 1                                                  | 3          |
| 10        | 48          | F   | SIADH                    | 121                        | 230            | 22                   | FR, NS                  | 5                          | 1                                   | 8                                                  | 4          |
| 11        | 87          | M   | SIADH                    | 123                        | 583            | 45                   | FR, NS                  | 3                          | 0                                   | 4                                                  | 4          |
| 12        | 88          | F   | SIADH                    | 126                        | 714            | 151                  | FR, ST                  | 6                          | -3                                  | 4                                                  | 6          |

UOsm=urine osmolality, LOS=length of stay after initiation of therapy for hyponatremia, SIADH=Syndrome of inappropriate ADH secretion, TZ=thiazide diuretics, HF=heart failure, FR=fluid restriction, ST=salt tablets, LD=loop diuretics, NS=normal saline, VRA=vasopressin antagonists, HS=hypertonic saline, KCL=potassium chloride, NA = not available

Supplemental material is neither peer-reviewed nor thoroughly edited by CJASN. The authors alone are responsible for the accuracy and presentation of the material.

**Supplemental Table 4. Daily Change in Plasma Sodium in Patients on Varying Doses of Urea.**

| Patient №       | Pre-Urea Therapy                   | Baseline plasma sodium (mEq/L) | Day 1                           |                                 | Day 2                                          |                                 | Day 3                                                      |                                 | Day 4                                                       |                                 | Day 5                                                      |                                 |
|-----------------|------------------------------------|--------------------------------|---------------------------------|---------------------------------|------------------------------------------------|---------------------------------|------------------------------------------------------------|---------------------------------|-------------------------------------------------------------|---------------------------------|------------------------------------------------------------|---------------------------------|
|                 |                                    |                                | Therapy                         | Change in plasma sodium (mEq/L) | Therapy                                        | Change in plasma sodium (mEq/L) | Therapy                                                    | Change in plasma sodium (mEq/L) | Therapy                                                     | Change in plasma sodium (mEq/L) | Therapy                                                    | Change in plasma sodium (mEq/L) |
| 4               | Furosemide 120 mg IV               | 117                            | Urea 30 g                       | 0                               | Urea 45 g, furosemide 40 mg IV                 | +4                              | Urea 45 g, furosemide 60 mg IV                             | 0                               | Urea 45 g, NaCl 3% 315 mL                                   | +2                              | Urea 60 g, furosemide 20 mg IV, NaCl 3% 125 mL             | +4                              |
| 5               | Furosemide 20 mg IV, KCl 40 mEq IV | 129                            | Urea 15 g                       | -2                              | Urea 15 g, furosemide 40 mg IV, NaCl 3% 260 mL | +1                              | Urea 60 g, furosemide 40 mg IV, KCl 80 mEq, NaCl 3% 960 mL | +1                              | Urea 60 g, furosemide 40 mg IV, KCl 20 mEq, NaCl 3% 1160 mL | +1                              | Urea 60 g, furosemide 20 mg IV, KCl 20 mEq, NaCl 3% 280 mL | 0                               |
| 9               | None                               | 119                            | Urea 15 g                       | +4                              | Urea 30 g                                      | +3                              | Urea 30 g                                                  | +5                              | Urea 30 g                                                   | 0                               | Urea 15 g                                                  | +1                              |
| 12              | None                               | 122                            | Urea 15 g                       | +2                              | Urea 30 g, furosemide 20 mg IV, NaCl 0.9% 1100 | +6                              | Urea 15 g, NaCl 0.9% 225 mL                                | +1                              | Urea 60 g                                                   | +3                              | Urea 45 g                                                  | -1                              |
| 15              | None                               | 128                            | Urea 15 g                       | -1                              | Urea 15 g                                      | +4                              | Urea 45 g                                                  | +2                              | Urea 30 g                                                   | NA                              | NA                                                         | NA                              |
| 18              | None                               | 123                            | Urea 30 g                       | +2                              | Urea 30 g, NaCl 0.9% 210 mL                    | -1                              | Urea 30 g, KCl 40 mEq                                      | +4                              | Urea 60 g                                                   | +2                              | Urea 60 g                                                  | -2                              |
| 42*             | NaCl 1 g PO                        | 129                            | Urea 15 g                       | -3                              | NaCl 1 g PO                                    | +1                              | NaCl 1 g PO                                                | -1                              | Urea 15 g                                                   | +3                              | Urea 15 g                                                  | 0                               |
| 53 <sup>†</sup> | NaCl 2 g PO                        | 124                            | Urea 45 g, NaCl 3 g PO          | +4                              | Urea 15 g                                      |                                 |                                                            |                                 |                                                             |                                 |                                                            |                                 |
| 56              | NaCl 0.9% 100 mL IV                | 128                            | Urea 15 g, NaCl 0.9% 1200 mL IV | +3                              | NaCl 0.9% 1200 mL                              | 0                               | Urea 15 g                                                  | +3                              | Urea 15 g                                                   | 0                               | Urea 30 g, furosemide 40 mg IV                             | -1                              |

\*Table only shows first 5 days of therapy. Patient's urea dose is eventually titrated up after 14 days of therapy.

<sup>†</sup>Patient received only 2 days of urea therapy and was then discharged.
